# Supplementary material
Source: Elsevier journal article supplement (https://univ-rennes.hal.science/hal-01475813v1/file/mmc1.pdf)
Supplement: mmc1 [file mmc1.pdf]

## [Support Information]

### **Evolution of the structural and microstructural characteristics of SrSn<sub>1-x</sub>Ti<sub>x</sub>O<sub>3</sub> thin films under the influence of the composition, the substrate and the deposition method**

André Luiz Menezes de Oliveira<sup>a,b,\*</sup>, Valérie Bouquet<sup>a</sup>, Vincent Dorcet<sup>a</sup>, Sophie Ollivier<sup>a</sup>, Stéphanie Députier<sup>a</sup>, Antônio Gouveia de Souza<sup>b</sup>, Iêda Maria Garcia dos Santos<sup>b</sup>, Ingrid Távora Weber<sup>c</sup> and Maryline Guilloux-Viry<sup>a</sup>

<sup>a</sup>*Institut des Sciences Chimiques de Rennes, UMR 6226 CNRS/ Université de Rennes 1, Campus de Beaulieu, 35042 Rennes cedex, France.*

<sup>b</sup>*LACOM/INCTMN, DQ, Universidade Federal de Paraiba, Campus I, CEP 58059- 900, João Pessoa, PB, Brazil*

<sup>c</sup>*LIMA, Instituto de Química, Universidade de Brasília, CEP 70910-900, Brasília, DF, Brazil.*

\* Corresponding author:

Email address: [andrel\\_ltm@hotmail.com](mailto:andrel_ltm@hotmail.com)

The EDX spectra for  $\text{SrSnO}_3$  (SSO) and  $\text{SrTiO}_3$  (STO) sintered targets are shown in **Figure S1-2**, respectively. The analyses were conducted on a SEM-EDS JEOL microscope (JSM 6400, Oxford INCA), using a voltage of 20 kV. Four spectra of each composition were collected for a higher precision atomic percentage evaluation. Only the elements relative to the composition of the target were detected and the average atomic percentages of the element were calculated and are shown on Table S1.

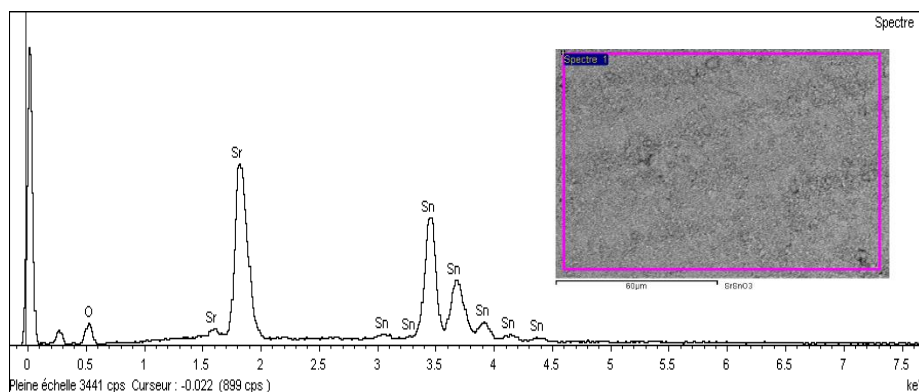

**Figure S1.** EDX spectrum of the SSO target. The SEM image relative to the spectrum is shown as insert.

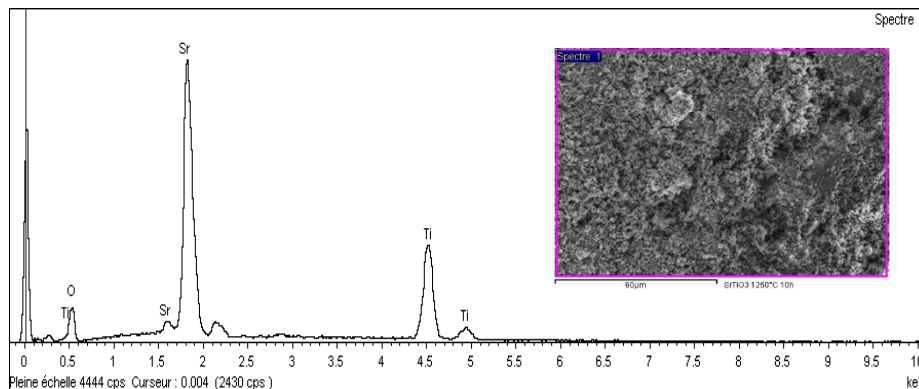

**Figure S2.** EDX spectrum of the STO target. The SEM image relative to the spectrum is shown as insert.

**Table S1.** Average atomic percentage obtained from the EDX analysis of the SSO and STO targets.

| <b>Sample</b> | <b>Atomic (%)</b> |             |             |            | <b>Total</b> |
|---------------|-------------------|-------------|-------------|------------|--------------|
|               | <b>Sr L</b>       | <b>Sn L</b> | <b>Ti L</b> | <b>O K</b> |              |
| SSO           | 21.2              | 20.3        | -           | 58.5       | 100%         |
| STO           | 23.8              | -           | 21.2        | 55.0       | 100%         |

**Table S2** – Band emission components deconvoluted from PL spectra of SST films grown on R-sapphire by CSD method.

| Sample     | <u>Violet - Blue</u> |     | <u>Green</u>     |     | <u>Yellow-Orange</u> |     | <u>Red</u>       |     |
|------------|----------------------|-----|------------------|-----|----------------------|-----|------------------|-----|
|            | $\lambda_m$ (nm)     | (%) | $\lambda_m$ (nm) | (%) | $\lambda_m$ (nm)     | (%) | $\lambda_m$ (nm) | (%) |
| R-sapphire | 437, 485             | 61  | 538              | 21  | 600                  | 17  | 682, 699         | 1   |
| STO        | 419, 453             | 41  | 507              | 31  | 570                  | 28  | -                | -   |
| SST50      | 422, 463             | 53  | 517              | 27  | 577                  | 19  | -                | -   |
| SSO        | 433, 465             | 46  | 509, 557         | 54  | -                    | -   | -                | -   |

**Table S3** – Band emission components deconvoluted from PL spectra of SST films grown on R-sapphire by PLD method.

| Sample     | <u>Violet- Blue</u> |     | <u>Green</u>     |     | <u>Yellow-Orange</u> |     | <u>Red</u>       |     |
|------------|---------------------|-----|------------------|-----|----------------------|-----|------------------|-----|
|            | $\lambda_m$ (nm)    | (%) | $\lambda_m$ (nm) | (%) | $\lambda_m$ (nm)     | (%) | $\lambda_m$ (nm) | (%) |
| R-sapphire | 437, 485            | 61  | 538              | 21  | 600                  | 17  | 682, 699         | 1   |
| STO        | 449                 | 23  | 509              | 47  | 577                  | 30  | -                | -   |
| SST50      | 443                 | 20  | 502, 556         | 67  | 610                  | 12  | -                | -   |
| SSO        | 425, 466            | 48  | 524              | 30  | 585                  | 22  | -                | -   |

**Table S4** – Band emission components deconvoluted from PL spectra of SST films grown on LAO by CSD method.

| Sample | <u>Violet -Blue</u> |     | <u>Green</u>     |     | <u>Yellow-Orange</u> |     | <u>Red</u>         |     |
|--------|---------------------|-----|------------------|-----|----------------------|-----|--------------------|-----|
|        | $\lambda_m$ (nm)    | (%) | $\lambda_m$ (nm) | (%) | $\lambda_m$ (nm)     | (%) | $\lambda_m$ (nm)   | (%) |
| LAO    | 461                 | 17  | 561              | 14  | 611                  | 30  | 672, 703, 730, 736 | 36  |
| STO    | 473                 | 3   | -                | -   | 573, 618             | 47  | 703, 712, 730      | 50  |
| SST50  | 468                 | 5   | -                | -   | 574, 613             | 53  | 665, 703, 719, 730 | 42  |
| SSO    | 462                 | 3   | -                | -   | 575, 619             | 56  | 667, 703, 721, 730 | 41  |

**Table S5** – Band emission components deconvoluted from PL spectra of SST films grown on LAO by PLD method.

| Sample | <u>Violet- Blue</u> |     | <u>Green</u>     |     | <u>Yellow- Orange</u> |     | <u>Red</u>         |     |
|--------|---------------------|-----|------------------|-----|-----------------------|-----|--------------------|-----|
|        | $\lambda_m$ (nm)    | (%) | $\lambda_m$ (nm) | (%) | $\lambda_m$ (nm)      | (%) | $\lambda_m$ (nm)   | (%) |
| LAO    | 461                 | 17  | 561              | 14  | 611                   | 30  | 672, 703, 730, 736 | 36  |
| STO    | 468                 | 6   | 569              | 10  | 610                   | 40  | 662, 703, 728, 730 | 43  |
| SST50  | 430, 495            | 7   | -                | -   | 581, 636              | 57  | 687, 703, 730, 737 | 36  |
| SSO    | 479                 | 7   | 568              | 11  | 610                   | 39  | 663, 703, 730, 731 | 43  |
